1 Grandmaternal smoking during pregnancy is associated with  
2 differential DNA methylation in their grandchildren  
3

4 [Funding](#)

5 The UK Medical Research Council and Wellcome (Grant ref: 217065/Z/19/Z) and the University  
6 of Bristol provide core support for ALSPAC. This research was made possible through the  
7 support of a grant from the John Templeton Foundation (60828).

8 [Authors](#)

9 Sarah Holmes Watkins<sup>1</sup>, Yasmin Iles-Caven<sup>2</sup>, Marcus Pembrey<sup>2</sup>, Jean Golding<sup>2</sup>, Matthew  
10 Suderman<sup>1</sup>

11 Corresponding author: Sarah Watkins ([s.h.watkins@bristol.ac.uk](mailto:s.h.watkins@bristol.ac.uk))

12 [Affiliations](#)

13 <sup>1</sup>**University of Bristol**, MRC Integrative Epidemiology Unit, Population Health Sciences, Bristol  
14 Medical School, Bristol, United Kingdom

15 <sup>2</sup>**University of Bristol**, Centre for Academic Child Health, Population Health Sciences, Bristol  
16 Medical School, Bristol, United Kingdom

17

18

## 19 Abstract

20 The idea that information can be transmitted to subsequent generation(s) by epigenetic means  
21 has been studied for decades but remains controversial in humans. Epidemiological studies  
22 have established that grandparental exposures are associated with health outcomes in their  
23 grandchildren, often with sex-specific effects; however the mechanism of transmission is still  
24 unclear. We conducted Epigenome Wide Association Studies (EWAS) to test whether  
25 grandmaternal smoking during pregnancy is associated with altered DNA methylation (DNAm)  
26 in their adolescent grandchildren. We used data from a birth cohort, with discovery and  
27 replication datasets of 1225 and 708 individuals (respectively), aged 15-17 years, and tested  
28 replication in the same individuals at birth and 7 years. We show for the first time that DNAm  
29 at a small number of loci is associated with grandmaternal smoking in humans, and their  
30 locations in the genome suggest hypotheses of transmission. We observe and replicate sex-  
31 specific associations at two sites on the X chromosome, one located in an imprinting control  
32 region and both within transcription factor binding sites (TFBSs). In fact, we observe  
33 enrichment for TFBSs among the CpG sites with the strongest associations, suggesting that  
34 TFBSs may be a mechanism by which grandmaternal exposures influence offspring DNA  
35 methylation. There is limited evidence that these associations appear at earlier timepoints, so  
36 effects are not static throughout development. The implication of this work is that effects of  
37 smoking during pregnancy may induce DNAm changes in later generations and that these  
38 changes are often sex-specific, in line with observational associations.

39 Keywords: ALSPAC; grandmaternal smoking; DNA methylation; transgenerational effects;  
40 prenatal smoking

## 41 Introduction

42 The idea that information can be transmitted to subsequent generation(s) by epigenetic means  
43 remains controversial in humans (1). The terminology used in the literature on this topic is not  
44 always consistent; here we use the term transgenerational to include all transmissions from  
45 one generation to subsequent generations. Of all epigenetic mechanisms that might be  
46 involved in transmission of information between generations, DNA methylation (DNAm) is a  
47 strong candidate because it is heritable over cell division. A frequent argument against this is  
48 the two widespread phases of global de-methylation followed by re-methylation that all  
49 humans undergo in germ cells, and then immediately post-fertilization at the blastocyst stage  
50 (which is necessary to allow cells to become pluripotent (2, 3)). However it has been shown  
51 that in human germ cells some genomic regions escape de-methylation (4), and imprinting  
52 control regions (ICRs) are not subject to de-methylation or re-methylation in the early embryo  
53 (5). Reports are also emerging of mechanisms which may preserve or restore DNAm at certain  
54 loci during the phase of germ cell de-methylation - such as transcription factors (TFs) (6, 7).

55 Most work on transgenerational responses in humans stems from epidemiological studies  
56 which report associations between grandparental exposures or experiences and grandchild  
57 health outcomes. Effects are often sex specific and unique to either the maternal or paternal  
58 line (8, 9). Tobacco smoke exposure accounts for a significant proportion of transgenerational  
59 studies in humans; this is because in human cohort studies records of smoking behaviour are  
60 commonly available, and compared to other exposures and lifestyle factors smoking behaviour  
61 is relatively easy to objectively and accurately recall and record, even by family members.

62 Grandmaternal smoking during pregnancy has been associated with a number of health  
63 outcomes in their grandchildren: paternal grandmother's smoking during pregnancy is  
64 associated with greater fat mass in their adult granddaughters, but not grandsons (10), and

65 with reduced prevalence of myopia in their grandchildren up to 7 years of age (with stronger  
66 effects in the grandsons); this study also demonstrated that early-onset myopia is associated  
67 with DNAm at multiple loci (11). Maternal grandmother smoking during pregnancy is  
68 associated with higher birth weight, and subsequent greater lean mass and higher  
69 cardiovascular fitness, in their grandsons (12, 13). It has been well established that smoking is  
70 associated with differences in DNAm, both in the individual (14, 15) and in the offspring of  
71 mothers who smoke during pregnancy (16, 17); currently one published study has assessed the  
72 association of grandmaternal smoking with DNAm in their grandchildren, at 26 DNAm sites  
73 that were known to be associated with prenatal smoke exposure. However none of these sites  
74 were found to be associated with grandmaternal smoking (18).

75 Here we test the hypothesis that grandmaternal smoking during pregnancy is associated with  
76 differences in DNAm in their grandchildren, at over 450,000 sites across the genome. We  
77 utilise the Avon Longitudinal Study of Parents and Children (ALSPAC) cohort (19), which has  
78 both DNAm data and detailed information about ancestral smoking. Almost 3,000 methylomes  
79 have now been assayed for the index children at 15 years of age, making this the largest  
80 human cohort available to assess transgenerational epigenetic inheritance.

## 81 [Methods](#)

### 82 [Cohort description](#)

83 We used two DNAm datasets from the ALSPAC cohort; please see supplementary methods for  
84 a detailed cohort description. Our discovery data were a newly generated dataset of 1869  
85 individuals at 15-17 years of age, who had their methylomes assayed on the Illumina EPIC  
86 Human Methylation microarray (EPIC array). Replication analyses utilised the original  
87 subsample of ALSPAC with DNAm data (known as the Accessible Resource for Integrated  
88 Epigenomic Studies, ARIES), assayed on the Illumina 450 K Human Methylation microarray

89 (450k array) (20). Although replication is ideally conducted in a separate dataset, we could  
90 identify no other available DNAm datasets of a similar age with ancestral smoking data.

#### 91 [Ancestral smoking data](#)

92 We determined whether the maternal and paternal grandmothers of the ALSPAC study  
93 children smoked during pregnancy using questionnaires completed by the study mother and  
94 father. Maternal and paternal lines were tested separately. The variable we used was a  
95 categorical 'Yes' or 'No'; see supplementary methods for details on how this was created.

#### 96 [Study exclusions](#)

97 To attempt to detect only grandmaternal effects, we excluded all individuals whose mother  
98 reported smoking whilst pregnant, and all adolescents who reported smoking themselves. We  
99 also excluded a small number of individuals from the EPIC dataset who were of non-white  
100 ethnicity, as reduced rates of both maternal and paternal grandmother smoking were  
101 associated with non-white ethnicity; please see supplementary methods for details.

#### 102 [New ALSPAC methylomes assayed on EPIC array](#)

103 DNA methylation profiles were generated as previously described but using the Illumina  
104 Infinium MethylationEPIC Beadchip (EPIC array) rather than then the Illumina Infinium  
105 HumanMethylation450k Beadchip (450k array) (21). Briefly, following DNA extraction, DNA  
106 was bisulfite converted using the Zymo EZ DNA Methylation™ kit (Zymo, Irvine, CA), and DNA  
107 methylation was measured using EPIC arrays. Arrays were scanned using Illumina iScan, and  
108 the initial quality review was carried out using GenomeStudio. A wide range of batch variables  
109 were recorded in a purpose-built laboratory information management system (LIMS).  
110 Additional quality control and normalization was carried out using the *meffil* R package. Of  
111 1885 initial samples, 16 were found to have an unacceptably high proportion of undetected  
112 probes (proportion > 10% with detection p-value < 0.01). The remaining 1869 were

113 normalized using functional normalization (22) as implemented in *meffil* with quantiles  
114 adjusted using 20 control probe principal components and slide as a random effect.

115 Original ARIES DNAm data assayed on 450k array

116 921 samples were available for the 15–17-year-olds from the original ARIES DNAm dataset,  
117 along with 849 individuals at birth, and 910 individuals at 7 years. Consent for biological  
118 samples was collected in accordance with the Human Tissue Act (2004). Processing, extraction,  
119 and quality control of DNAm data has been described in detail for these samples (20), as have  
120 normalisation and outlier removal procedures (21). 21 further individuals were removed as  
121 they were the only sample on a slide, preventing their adjustment for slide effects.

#### 122 Filtering DNAm sites

123 All sites on the X and Y chromosomes were removed from the analyses using all individuals;  
124 the Y chromosome was removed from the single sex analyses. No other sites were removed,  
125 but results were checked against probes flagged as being cross-reactive or having a SNP at the  
126 CpG site, in the single base extension, or in the probe body (23). Results were also checked for  
127 being located in the highly polymorphic human leukocyte antigen (HLA) region.

#### 128 EWAS

129 Six EWAS were performed in both the discovery (EPIC) and replication (450k) datasets, testing  
130 the association of DNAm with maternal grandmother smoking in all individuals, in females, and  
131 in males, and with paternal grandmother smoking, in all individuals, in females, and in males.  
132 EWAS were conducted using the R package *meffil* (21). A genome-wide significance threshold  
133 of  $p < 9e-08$  was used for the EPIC analyses (24), and  $p < 2.4e-07$  for the 450k (25). Covariates for  
134 all EWAS were: age at DNAm sample; sex (for the analyses with both sexes); batch effects  
135 (plate for the EPIC samples, slide for the 450k samples); and cell count proportions estimated  
136 using a deconvolution algorithm (26) implemented in *meffil*, based on the “blood gse35069

137 complete” cell type reference. Because known covariates can be imperfect and miss sources of  
138 unwanted variation, we conducted a sensitivity analysis adjusting for surrogate variables (using  
139 surrogate variable analysis (SVA)(27) as implemented in meffil) where we assessed correlation  
140 between effect sizes of the SVA and known covariates models. As there was high correlation  
141 between effect sizes (>0.97) the known covariates model was used for all analyses – the high  
142 correlation suggests that the main model accounted for all substantial sources of DNAm  
143 variation, and SVA risks removing biologically interesting sources of variation in the data.

#### 144 [Testing for replication](#)

145 We used three complementary approaches to test for replication of the sites most strongly  
146 associated with the exposure in the discovery dataset, as no single measure can capture this.  
147 Firstly, we took the 25 top associated sites from the EPIC analyses that were also present on  
148 the 450k array and assessed them for association in the 450k analyses at the equivalent of  
149  $p < 0.05/25$ . Secondly, we correlated effect sizes between the discovery and replication  
150 datasets, for the top 10, 25, 50, 100 and 200 sites identified in each discovery EWAS. Finally,  
151 we conducted a binomial test for each discovery EWAS to ascertain whether the top 10, 25, 50,  
152 100 and 200 sites replicated at  $p < 0.05$  with the same direction of effect.

#### 153 [Meta-analysis](#)

154 For each of the six EWAS (maternal grandmother smoking: all individuals, males, and females;  
155 and paternal grandmother smoking: all individuals, males, and females), we meta-analysed  
156 results from the EPIC and 450k analyses at 15-17 years, using all sites common to both arrays.  
157 We performed meta-analysis of the effect sizes and standard errors using METAL (28).

#### 158 [X chromosome analysis](#)

159 As previous work has identified that associations between ancestral exposures and health  
160 outcomes in later generations are often sex-specific, and X-inactivation is specific to females,

161 we tested the hypothesis that sites on the X chromosome would associate with grandmaternal  
162 smoking during pregnancy. We tested the X chromosome separately for each sex-stratified  
163 EWAS and meta-analysis, adjusting for X chromosome significance ( $p < 2.7e-06$  in EPIC,  $p < 4.5e-$   
164  $06$  in 450k and  $p < 4.9e-06$  in the meta-analysis).

#### 165 [Escapees analysis](#)

166 As some DNAm sites have been shown to escape the wave of de-methylation in germ cells (4),  
167 we tested the hypothesis that these sites are associated with grandmaternal smoking during  
168 pregnancy. To do this we took the 116,618 regions of the genome that have been identified as  
169 escaping de-methylation (4) (which have recently been made available as supplementary  
170 material in a bioRxiv paper (29)). We identified all sites on the EPIC array that were within  
171 those genomic regions ( $n=36,051$ ) and tested them for association with grandmaternal  
172 smoking at Bonferroni corrected significance ( $p < 0.05/36051 = 1.4e-6$ ).

#### 173 [Imprinting control region analysis](#)

174 As ICRs are not subject to the phases of de-methylation and re-methylation in the early  
175 embryo, we sought to test whether DNAm sites in identified regions might associate with  
176 grandmaternal smoking. We took the set of 984 DNAm sites present on the EPIC array  
177 identified as being within ICRs at  $FDR < 0.05$  (30). We tested these sites for association with  
178 grandmaternal smoking at Bonferroni corrected significance ( $p < 0.05/984 = 5.1e-5$ ). There were  
179 29 ICR sites that overlapped with the escapees.

#### 180 [Testing replication earlier in life](#)

181 To ascertain whether any sites associated with grandmaternal smoking at 15-17 years are  
182 differentially methylated from birth, we repeated each EWAS using DNAm profiles for ALSPAC  
183 participants from blood samples collected at birth and 7 years (see supplementary table 1 for  
184 participant numbers). We included the same covariates as for the adolescents, aside from at



185 birth where gestational age was substituted for age. As the birth and 7 years DNAm profiles  
186 were assayed from different sample types (blood spots and white cells at birth; white cells and  
187 whole blood at 7 years), sample type was also included as a covariate. In addition to using this  
188 analysis to assess replication of associations in the 15-17-year-olds, we assessed the opposite,  
189 replication of associations at the birth and age 7 in the 15-17-year-old discovery dataset.

#### 190 [Transcription factor binding site \(TFBS\) enrichment analysis](#)

191 To test the hypothesis that differential DNAm associated with grandmaternal smoking might  
192 be mediated by TFs preserving or maintaining methylation status, we tested whether DNAm  
193 sites were located near TFBS more than expected by chance. To do this we took the top 25  
194 sites from each discovery EWAS and tested them for TFBS enrichment against all sites on the  
195 EPIC array used in our EWAS (n sites=838,019) using LOLA locus overlap (31). We used the  
196 Encode TFBS (32, 33) region set created by the LOLA team, comprising ChIP-seq data on 161  
197 TFs, which is available through <http://lolaweb.databio.org>. We tested 100bp on either side of  
198 the DNAm site, removing overlapping sites to prevent inflation of results. Results were  
199 reduced to TFBS measured in blood which were associated in at least one EWAS at  $p < 0.05$ . To  
200 assess whether individual sites identified in the main analysis were associated with a TFBS, we  
201 used the hg19 version of the UCSC genome browser (34); <https://genome-euro.ucsc.edu/>.

#### 202 [Enrichment of prenatal- and own smoking- associated sites](#)

203 We tested the hypothesis that DNAm sites that are established as being associated with  
204 prenatal smoking and own smoking would be enriched in our EWAS associations, to ascertain  
205 whether transgenerational transmission might be related to these sites. To do this we  
206 evaluated statistical inflation of EWAS associations among the 568 DNAm sites (of which 540  
207 were available on the EPIC array) previously reported to be associated with maternal prenatal  
208 smoking in cord blood (17), and the 2623 sites (2445 available on the EPIC array) reported to

209 be associated with own smoking (35). For each, inflation beyond expected levels was  
210 evaluated by generating QQ plots and lambda values. We then used a one-sided Wilcoxon rank  
211 sum test to ask if DNAm sites associated with prenatal- and own-smoking had lower p-values  
212 in our EWAS than expected from a random selection.

### 213 [Enrichment of lean mass-associated sites](#)

214 We finally sought to identify whether DNAm sites associated with grandmaternal smoking  
215 might be related to lean mass (a previously reported epidemiological association (13)).  
216 Although no published EWAS of lean mass is available, 47 sites associated with lean mass in  
217 the mothers in ALSPAC at  $p < 1e-04$  are available in the EWAS catalog (36);  
218 <http://www.ewascatalog.org/>. We checked for inflation of these sites in our data using QQ  
219 plots and lambda values, and tested enrichment for these sites using a Wilcoxon rank sum test.

## 220 [Results](#)

### 221 [Study characteristics](#)

222 Of the 1869 individuals with EPIC array DNAm profiles passing QC, we removed 267 because  
223 they were either of non-white ethnicity or had missing ethnicity data – this was because non-  
224 white ethnicity was associated with lower rates of smoking for both maternal and paternal  
225 grandmothers ( $p=0.03$  and  $0.007$ , respectively). Of the remaining 1602 participants, 285 were  
226 removed because their mother reported that she smoked during her pregnancy, and 73  
227 further individuals were removed because they reported smoking themselves. Of the 910  
228 individuals with 450k DNAm data passing QC and filtering, 125 individuals were removed  
229 because their mother reported smoking during pregnancy, and a further 59 were removed as  
230 they reported smoking themselves. All individuals in the 450k dataset were of white ethnicity.  
231 Table 1 summarises the characteristics of the adolescent datasets; supplementary table 1  
232 details the numbers of participants with complete data in each EWAS.

| Dataset | Measure                       | MGM analysis | PGM analysis | Full cohort           |
|---------|-------------------------------|--------------|--------------|-----------------------|
| EPIC    | N participants                | <b>1225</b>  | <b>1021</b>  | <b>1869</b>           |
|         | Grandmaternal smoking (% yes) | 30.9%        | 38.4%        | 34% MGM; 39% PGM*     |
|         | Sex (% Female)                | 50.7%        | 51.6%        | 52.4%                 |
|         | Age (mean(SD))                | 17.8 (0.4)   | 17.8 (0.4)   | 17.8 (0.5)            |
| 450k    | N participants                | 708          | 601          | 910                   |
|         | Grandmaternal smoking (% yes) | 29.9%        | 36.6%        | 31.7% MGM; 39.4% PGM* |
|         | Sex (% Female)                | 51.1%        | 51.6%        | 51.6%                 |
|         | Age (mean(SD))                | 17.1 (1)     | 17.1 (1)     | 17.1 (1)              |

233 *Table 1: Summary of variables used in the analysis for participants with DNAm data assayed on the EPIC and 450k*  
 234 *arrays. MGM = maternal grandmother, PGM = paternal grandmother. \* percentages in this cell are calculated after*  
 235 *omitting participants with missing ancestral smoking data.*

## 236 Discovery EWAS results

237 No associations tested using the main model (all covariates) survived the Bonferroni-adjusted  
 238 p-value threshold ( $p < 9e-8$ ). variation. All associations  $p < 1e-04$  using the main model are  
 239 reported in supplementary tables 2-7.

## 240 Replication

241 All associations in the replication dataset  $p < 1e-04$  using the main model are reported in  
 242 supplementary tables 8-13. Firstly we tested replication at  $p < 0.05/25$  for each of the six EWAS.  
 243 For maternal grandmother smoking, the association at a single site on the X chromosome  
 244 replicates in the females only analysis (cg19782749,  $p = 0.001$ ; **Error! Reference source not**  
 245 **found.**). For paternal grandmother smoking, none of the associations at the top 25 sites  
 246 replicate. Secondly, we evaluated correlation of effect sizes for associations at the top sites in  
 247 each EWAS. For maternal grandmother smoking in the all-individuals analysis, there were  
 248 moderate negative correlations for the top 25 to 200 sites ( $R = -0.18$  to  $-0.45$ ,  $p < 0.03$ ). Within  
 249 each of the other five EWAS analyses, moderate correlations ( $R = 0.28$  to  $0.45$ ,  $p < 0.05$ ) were  
 250 found for at most two two subsets of sites - correlations were otherwise small ( $R < 0.2$ ), and  
 251 four analyses featured both negative and positive correlations. Therefore we do not find  
 252 consistent evidence of replication of effect sizes in our analyses. Thirdly, we asked if direction

253 of effect was preserved in replication data for the top associated sites. There was again  
254 evidence supporting replication for maternal grandmother smoking in female grandchildren (in  
255 four of five tests  $p < 0.009$ , binomial test), but none of the other EWAS. Details can be found in  
256 supplementary table 14.

257 Using the same replication methods we evaluated agreement between associations observed  
258 in male and female stratified analyses in the discovery dataset. For maternal grandmother  
259 smoking, effects of associations at top female sites appear to be negatively correlated with  
260 effects in males ( $R = -0.21$  to  $-0.43$ ,  $p < 0.05$ ). None of the other replication analyses yielded  
261 evidence for agreement or disagreement between top male and female associations. For  
262 paternal grandmother smoking, effect sizes of top female sites were positively correlated with  
263 effects in males ( $R = 0.34$  to  $0.66$ ,  $p < 0.04$ ); we also observe agreement in direction of effect  
264 for associations at the top 200 female sites. Details are in supplementary table 15.

## 265 [Meta-analysis](#)

266 As the datasets were generated using different Illumina Beadchip arrays, we meta-analysed  
267 only the 438,459 sites that were common to both arrays. No associations survived Bonferroni-  
268 adjustment for multiple tests ( $p < 2.4e-07$ ).

## 269 [X chromosome](#)

270 When testing the X chromosome, only one association survived adjustment for multiple tests  
271 ( $p < 2.7e-6$ ). The association was with paternal grandmother smoking in the males  
272 (cg27456137;  $p = 1.9e-06$ ); **Error! Reference source not found.** The probe for this site has been  
273 flagged (23) as cross-hybridising to a 49bp sequence 500bp from cg27456137. Three probes on  
274 the EPIC array reside within that 49bp sequence; however none were associated with either  
275 grandmother smoking near genome-wide significance (all  $p > 0.03$ ).

276 [Escapees](#)

277 When testing whether DNAm sites located within escapee regions were associated at the  
278 Bonferroni corrected p-value  $p < 1.5e-06$  in the discovery dataset, we find no sites associated  
279 with maternal or paternal grandmother smoking.

280 [Imprinting control regions](#)

281 We similarly tested the hypothesis that transmission might involve sites within ICRs. We  
282 observe one association that survives correction for multiple tests ( $p < 5.1e-05$ ); the association  
283 is with paternal grandmother smoking (cg15068552,  $p = 2.2e-05$ ); **Error! Reference source not**  
284 **found..**

285 [Testing associations and replication earlier in life](#)

286 In cord blood, we find one site associated with maternal grandmother smoking in all  
287 individuals, and two sites associated with paternal grandmother smoking in females (see **Error!**  
288 **Reference source not found.** for a summary). In the 7-year-olds, no sites were associated with  
289 either grandmother smoking in any of the six analyses. All associations  $p > 1e-04$  using the main  
290 model are reported in supplementary tables 16-27. None of these associations were observed  
291 at adolescence (i.e., in the main discovery dataset) below the  $p < 0.05/3$  threshold (all  $p > 0.07$ ).

292 We then tested whether two of the three associations observed at adolescence (i.e., in the  
293 main discovery dataset) were observed at birth and at 7 years (cg15068552 in all individuals  
294 when the paternal grandmother smoked, and cg19782749 in females when the maternal  
295 grandmother smoked; cg27456137 could not be tested because it was not measured by the  
296 450k array). We see a suggestion of replication at cg15068552 at birth in all individuals when  
297 the paternal grandmother smoked ( $p = 0.02$ ), and at cg19782749 at 7 years in females when the  
298 maternal grandmother smoked ( $p = 0.04$ ).

299

| Age (subset)            | Array       | Analysis    | CpG        | chr  | position  | p value                      | Effect size                |
|-------------------------|-------------|-------------|------------|------|-----------|------------------------------|----------------------------|
| 15-17 (females)         | EPIC + 450k | Replication | cg19782749 | Xchr | 132091720 | 5.2e-05 (EPIC); 0.001 (450k) | 0.002 (EPIC); 0.001 (450k) |
| 15-17 (males)           | EPIC        | PGM (X chr) | cg27456137 | chrX | 129403024 | 1.9e-06                      | -0.01                      |
| 15-17 (all individuals) | EPIC        | PGM (ICR)   | cg15068552 | 7    | 130130203 | 2.2e-05                      | -0.02                      |
| Birth (all individuals) | 450k        | MGM         | cg19426678 | 12   | 117537404 | 2.1e-07                      | -0.002                     |
| Birth (females)         | 450k        | PGM         | cg22682200 | 10   | 120001266 | 2.3e-09                      | -0.05                      |
| Birth (females)         | 450k        | PGM         | cg26827966 | 5    | 172189374 | 5.9e-08                      | -0.03                      |

300 *Table 2: Sites which were found to associate with grandmaternal smoking in all analyses. Models were adjusted for*  
 301 *all covariates (age/gestational age, predicted cell counts, and batch effects).*

302 [Transcription factor binding site analysis](#)

303 Using locus overlap enrichment analysis (LOLA), we find enrichment of the top 25 EWAS  
 304 associations at the TFBS for four TFs (nominal  $p < 0.05$ ) in EWAS of paternal grandmother  
 305 smoking. CtBP2 is enriched for the EWAS of males and females (log OR=1.8,  $p=0.02$ ); NR2F2 is  
 306 enriched in the female-stratified EWAS (log OR=1.8,  $p=0.02$ ); and CtBP2 (log OR=1.9,  $p=0.01$ ),  
 307 SAP30 (log OR=1.4,  $p=0.04$ ), and ZKSCAN1 (log OR=2.3,  $p=0.02$ ) are enriched in the males-only  
 308 EWAS. There are no enrichments in the maternal grandmother smoking analyses. These  
 309 enrichment results are illustrated in **Error! Reference source not found.** We then used the  
 310 UCSC genome browser to assess whether the six individual sites identified were located within  
 311 TFBS. We find all six are located in sites which bind at least one TF; these are detailed in  
 312 supplementary table 28.

313

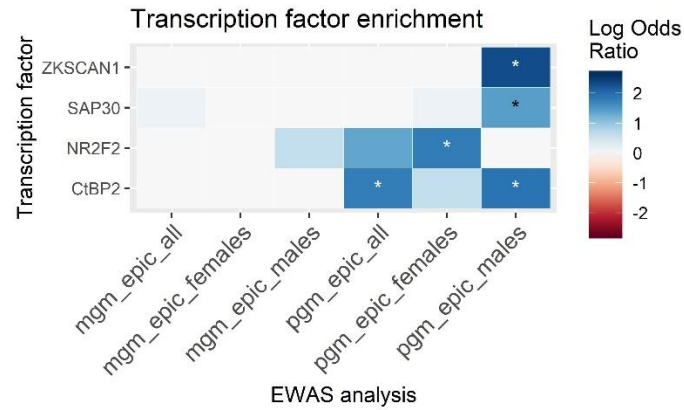

314

315 *Figure 1: Transcription factor binding site enrichments for TFBS that reached  $p < 0.05$  for at least one of the EWAS.*  
316 *Heatmap is coloured by the log odds ratio, \*= $p < 0.05$*

### 317 Enrichment of prenatal- and own smoking- associated sites

318 Among sites associated with prenatal smoking, we observe some inflation for associations with

319 paternal grandmother smoking in males ( $\lambda = 1.27 \pm 0.13$ ) and females ( $\lambda = 1.12 \pm$

320  $0.11$ ). This inflation is replicated only for males in the 450k dataset ( $\lambda = 1.46 \pm 0.12$ ).

321 Among sites associated with own smoking, there is weak inflation for associations with

322 paternal grandmother smoking in females ( $\lambda = 1.16 \pm 0.05$ ), but this association is not

323 replicated. Inflation results are summarised in Table 3.

| EWAS                   | Prenatal smoking sites |                     |                        |                     | Own smoking sites      |                     |                       |                     |
|------------------------|------------------------|---------------------|------------------------|---------------------|------------------------|---------------------|-----------------------|---------------------|
|                        | EPIC                   |                     | 450k                   |                     | EPIC                   |                     | 450k                  |                     |
|                        | Lambda<br>± SE         | Wlicoxon<br>p-value | Lambda<br>± SE         | Wlicoxon<br>p-value | Lambda<br>± SE         | Wlicoxon<br>p-value | Lambda<br>± SE        | Wlicoxon<br>p-value |
| <b>MGM<br/>all</b>     | 0.93 ±<br>0.09         | 0.67                | 0.89 ±<br>0.09         | 0.88                | 0.96 ±<br>0.04         | 0.85                | 1.03 ±<br>0.04        | 0.2                 |
| <b>MGM<br/>females</b> | 0.79 ±<br>0.07         | 0.91                | 1.08 ±<br>0.08         | 0.86                | 0.9 ±<br>0.04          | 0.53                | 1.01 ±<br>0.04        | 1                   |
| <b>MGM<br/>males</b>   | 0.93 ±<br>0.08         | 0.88                | 0.88 ±<br>0.09         | <b>0.02</b>         | 0.89 ±<br>0.04         | 1                   | 0.96 ±<br>0.05        | <b>4.1e -05</b>     |
| <b>PGM all</b>         | <b>1.27 ±<br/>0.11</b> | 0.62                | 1.09 ±<br>0.11         | <b>2.20E-05</b>     | <b>1.21 ±<br/>0.05</b> | 0.86                | 0.97 ±<br>0.03        | <b>1.10E-07</b>     |
| <b>PGM<br/>females</b> | <b>1.12 ±<br/>0.11</b> | 0.58                | 0.85 ±<br>0.06         | 0.11                | <b>1.16 ±<br/>0.05</b> | 0.09                | 0.81 ±<br>0.04        | <b>0.01</b>         |
| <b>PGM<br/>males</b>   | <b>1.27 ±<br/>0.13</b> | <b>0.02</b>         | <b>1.46 ±<br/>0.12</b> | <b>8.30E-08</b>     | 0.93 ±<br>0.05         | 0.99                | <b>1.1 ±<br/>0.05</b> | <b>1.42E-06</b>     |

324 *Table 3: Summary of lambda values to illustrate inflation, and Wilcoxon rank-sum p-values to illustrate enrichment,*  
 325 *of DNAm sites previously identified to be associated with prenatal smoke exposure and own smoking.*

326 [Inflation test for lean mass-associated DNAm sites](#)

327 We observe no evidence for inflation among CpG sites associated with lean mass. These  
 328 inflation results are summarised in supplementary table 29.

329 [Discussion](#)

330 In summary, we find some evidence for effects of grandmother smoking on DNA methylation  
 331 in her adolescent grandchildren; on the X chromosome, in an ICR, in TFBS, and among prenatal  
 332 smoking-associated DNAm sites. We also find three sites associated with grandmaternal  
 333 smoking in cord blood, but these associations do not appear to persist. In most cases,  
 334 associations appear to be sex-specific in line with previous research (8-10). Associations are  
 335 summarised in Figure 2.



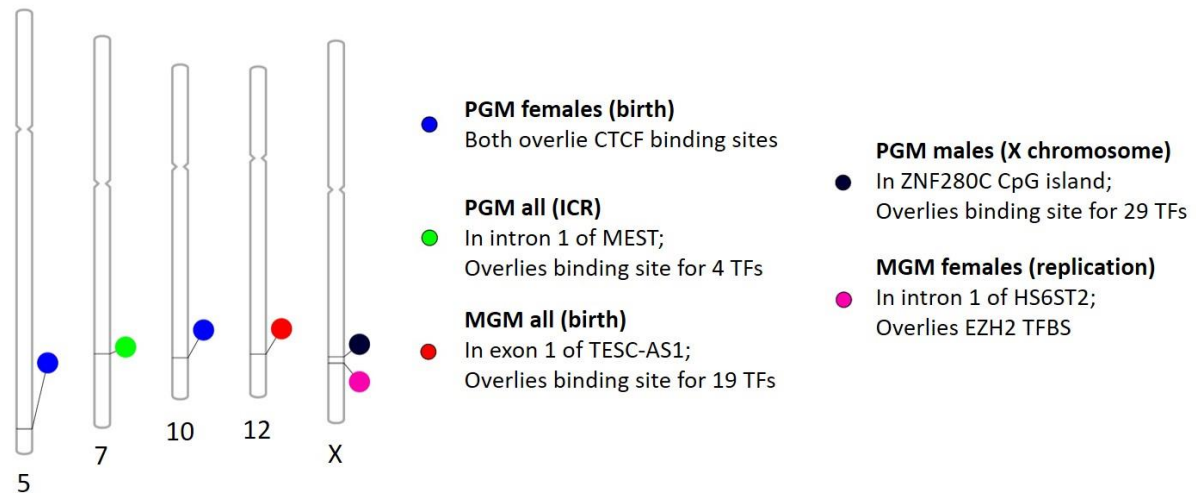

336

337 *Figure 2: Graphical summary illustrating the main study findings. MGM = maternal grandmother, PGM = paternal*  
 338 *grandmother. Bold text indicates EWAS (analysis); text indicates whether the site is located within a gene and*  
 339 *whether it is located in a TFBS.*

340 We find some evidence for mechanisms by which DNAm might be preserved through phases of  
 341 de- and re-methylation in the germ cell. Two of the six sites we identify are on the X  
 342 chromosome, giving a possible route by which sex-specific differences in transmission of  
 343 responses across generations might occur. We find evidence suggesting TFs might have a role  
 344 in the transmission of epigenetic responses to smoking across generations - both from the  
 345 enrichment analysis, and the location of all six individual sites within TFBS. We find evidence  
 346 for a single site residing within an ICR, but find no evidence for sites in regions known to  
 347 escape de-methylation in germ cells. Finally, we find suggestive evidence of replication of two  
 348 sites identified in adolescents in earlier DNAm samples (one at birth and one at 7 years),  
 349 although no site replicates across all three timepoints.

350 We find evidence of inflation and enrichment of sites associated with prenatal smoking only in  
 351 males when their paternal grandmother smoked, and do not find consistent inflation of sites  
 352 associated with own smoking. This could suggest that grandmaternal smoking affects DNAm  
 353 through different mechanisms to maternal smoking. The inflation we see in males is contrary  
 354 to previous null prenatal findings (18); the reason for this discrepancy may be that we test a  
 355 larger number of sites. We do not see any inflation or enrichment of lean mass associated

356 DNAm sites in our analyses, suggesting that the differences in lean mass observed previously  
357 (13) may not be related to differences in DNAm.

358 Because TFBS are a consistent feature of our findings, our study supports the idea that DNAm  
359 changes may be linked to ancestral smoking by TF binding events. These binding events could  
360 either shield DNAm from being modified in early development or induce DNAm changes  
361 consistent with ancestral smoking, as DNAm status can be restored by TFs during germline and  
362 embryonic development following erasure (6, 7). However it is not clear why the associations  
363 we do see would change over time, and so we cannot rule out the possibility that we find  
364 differences at these DNAm sites due to another factor that is influenced by grandmaternal  
365 smoking, such as parental behaviour. We suggest TFBS might present the most promising line  
366 of future work in transgenerational epigenetic responses in humans.

367 Strengths of our study are that we assessed grandmaternal smoking effects in a large cohort of  
368 humans with ancestral smoking data, alongside rich phenotypic data. We have DNAm data  
369 from birth so were able to assess whether DNAm differences at these sites are present  
370 between birth and adolescence. Limitations include that the 450k and EPIC array platforms  
371 only cover around 2% and 4% of the genome, respectively, and that our replication dataset  
372 came from the same birth cohort as the discovery data.

### 373 [Acknowledgements](#)

374 We are extremely grateful to all the families who took part in this study, the midwives for their  
375 help in recruiting them, and the whole ALSPAC team, which includes interviewers, computer  
376 and laboratory technicians, clerical workers, research scientists, volunteers, managers,  
377 receptionists and nurses.

## 378 Funding

379 The UK Medical Research Council and Wellcome (Grant ref: 217065/Z/19/Z) and the University  
380 of Bristol provide core support for ALSPAC. This publication is the work of the authors, and  
381 Sarah Watkins and Matthew Suderman will serve as guarantors for the contents of this paper.  
382 A comprehensive list of grants funding is available on the ALSPAC website  
383 (<http://www.bristol.ac.uk/alspac/external/documents/grant-acknowledgements.pdf>). This  
384 research was made possible through the support of a grant from the John Templeton  
385 Foundation (60828). The opinions expressed in this publication are those of the author(s) and  
386 do not necessarily reflect the views of the John Templeton Foundation.  
387 GWAS data was generated by Sample Logistics and Genotyping Facilities at Wellcome Sanger  
388 Institute and LabCorp (Laboratory Corporation of America) using support from 23andMe.

## 389 References

- 390 1. Horsthemke B. A critical view on transgenerational epigenetic inheritance in humans.  
391 Nat Commun. 2018;9(1):2973.
- 392 2. Feng S, Jacobsen SE, Reik W. Epigenetic reprogramming in plant and animal  
393 development. Science. 2010;330(6004):622-7.
- 394 3. Smallwood SA, Kelsey G. De novo DNA methylation: a germ cell perspective. Trends  
395 Genet. 2012;28(1):33-42.
- 396 4. Tang WW, Dietmann S, Irie N, Leitch HG, Floros VI, Bradshaw CR, et al. A Unique Gene  
397 Regulatory Network Resets the Human Germline Epigenome for Development. Cell.  
398 2015;161(6):1453-67.
- 399 5. Reik W, Walter J. Genomic imprinting: parental influence on the genome. Nat Rev  
400 Genet. 2001;2(1):21-32.

- 401 6. Jung YH, Kremisky I, Gold HB, Rowley MJ, Punyawai K, Buonanotte A, et al.  
402 Maintenance of CTCF- and Transcription Factor-Mediated Interactions from the Gametes to  
403 the Early Mouse Embryo. *Mol Cell*. 2019;75(1):154-71 e5.
- 404 7. Kremisky I, Corces VG. Protection from DNA re-methylation by transcription factors in  
405 primordial germ cells and pre-implantation embryos can explain trans-generational epigenetic  
406 inheritance. *Genome Biol*. 2020;21(1):118.
- 407 8. Pembrey ME, Bygren LO, Kaati G, Edvinsson S, Northstone K, Sjöström M, et al. Sex-  
408 specific, male-line transgenerational responses in humans. *Eur J Hum Genet*. 2006;14(2):159-  
409 66.
- 410 9. Vagero D, Pinger PR, Aronsson V, van den Berg GJ. Paternal grandfather's access to  
411 food predicts all-cause and cancer mortality in grandsons. *Nat Commun*. 2018;9(1):5124.
- 412 10. Golding J, Gregory S, Northstone K, Iles-Caven Y, Ellis G, Pembrey M. Investigating  
413 Possible Trans/Intergenerational Associations With Obesity in Young Adults Using an  
414 Exposome Approach. *Front Genet*. 2019;10:314.
- 415 11. Williams C, Suderman M, Guggenheim JA, Ellis G, Gregory S, Iles-Caven Y, et al.  
416 Grandmothers' smoking in pregnancy is associated with a reduced prevalence of early-onset  
417 myopia. *Sci Rep*. 2019;9(1):15413.
- 418 12. Miller LL, Pembrey M, Davey Smith G, Northstone K, Golding J. Is the growth of the  
419 fetus of a non-smoking mother influenced by the smoking of either grandmother while  
420 pregnant? *PLoS One*. 2014;9(2):e86781.
- 421 13. Golding J, Northstone K, Gregory S, Miller LL, Pembrey M. The anthropometry of  
422 children and adolescents may be influenced by the prenatal smoking habits of their  
423 grandmothers: a longitudinal cohort study. *Am J Hum Biol*. 2014;26(6):731-9.

- 424 14. Ambatipudi S, Cuenin C, Hernandez-Vargas H, Ghantous A, Le Calvez-Kelm F, Kaaks R,  
425 et al. Tobacco smoking-associated genome-wide DNA methylation changes in the EPIC study.  
426 *Epigenomics*. 2016;8(5):599-618.
- 427 15. Shenker NS, Polidoro S, van Veldhoven K, Sacerdote C, Ricceri F, Birrell MA, et al.  
428 Epigenome-wide association study in the European Prospective Investigation into Cancer and  
429 Nutrition (EPIC-Turin) identifies novel genetic loci associated with smoking. *Hum Mol Genet*.  
430 2013;22(5):843-51.
- 431 16. Richmond RC, Simpkin AJ, Woodward G, Gaunt TR, Lyttleton O, McArdle WL, et al.  
432 Prenatal exposure to maternal smoking and offspring DNA methylation across the lifecycle:  
433 findings from the Avon Longitudinal Study of Parents and Children (ALSPAC). *Hum Mol Genet*.  
434 2015;24(8):2201-17.
- 435 17. Joubert BR, Felix JF, Yousefi P, Bakulski KM, Just AC, Breton C, et al. DNA Methylation  
436 in Newborns and Maternal Smoking in Pregnancy: Genome-wide Consortium Meta-analysis.  
437 *Am J Hum Genet*. 2016;98(4):680-96.
- 438 18. Joubert BR, Haberg SE, Bell DA, Nilsen RM, Vollset SE, Middtun O, et al. Maternal  
439 smoking and DNA methylation in newborns: in utero effect or epigenetic inheritance? *Cancer*  
440 *Epidemiol Biomarkers Prev*. 2014;23(6):1007-17.
- 441 19. Boyd A, Golding J, Macleod J, Lawlor DA, Fraser A, Henderson J, et al. Cohort Profile:  
442 the 'children of the 90s'--the index offspring of the Avon Longitudinal Study of Parents and  
443 Children. *Int J Epidemiol*. 2013;42(1):111-27.
- 444 20. Relton CL, Gaunt T, McArdle W, Ho K, Duggirala A, Shihab H, et al. Data Resource  
445 Profile: Accessible Resource for Integrated Epigenomic Studies (ARIES). *Int J Epidemiol*.  
446 2015;44(4):1181-90.

- 447 21. Min JL, Hemani G, Davey Smith G, Relton C, Suderman M. Meffil: efficient  
448 normalization and analysis of very large DNA methylation datasets. *Bioinformatics*.  
449 2018;34(23):3983-9.
- 450 22. Fortin JP, Labbe A, Lemire M, Zanke BW, Hudson TJ, Fertig EJ, et al. Functional  
451 normalization of 450k methylation array data improves replication in large cancer studies.  
452 *Genome Biol.* 2014;15(12):503.
- 453 23. Pidsley R, Zotenko E, Peters TJ, Lawrence MG, Risbridger GP, Molloy P, et al. Critical  
454 evaluation of the Illumina MethylationEPIC BeadChip microarray for whole-genome DNA  
455 methylation profiling. *Genome Biol.* 2016;17(1):208.
- 456 24. Mansell G, Gorrie-Stone TJ, Bao Y, Kumari M, Schalkwyk LS, Mill J, et al. Guidance for  
457 DNA methylation studies: statistical insights from the Illumina EPIC array. *BMC Genomics*.  
458 2019;20(1):366.
- 459 25. Saffari A, Silver MJ, Zavattari P, Moi L, Columbano A, Meaburn EL, et al. Estimation of a  
460 significance threshold for epigenome-wide association studies. *Genet Epidemiol*.  
461 2018;42(1):20-33.
- 462 26. Houseman EA, Accomando WP, Koestler DC, Christensen BC, Marsit CJ, Nelson HH, et  
463 al. DNA methylation arrays as surrogate measures of cell mixture distribution. *BMC*  
464 *Bioinformatics*. 2012;13:86.
- 465 27. Leek JT, Storey JD. Capturing heterogeneity in gene expression studies by surrogate  
466 variable analysis. *PLoS Genet*. 2007;3(9):1724-35.
- 467 28. Willer CJ, Li Y, Abecasis GR. METAL: fast and efficient meta-analysis of genomewide  
468 association scans. *Bioinformatics*. 2010;26(17):2190-1.
- 469 29. Dietmann S, Keogh MJ, Tang W, Magnusdottir E, Kobayashi T, Chinnery PF, et al.  
470 Transposable elements resistant to epigenetic resetting in the human germline are epigenetic  
471 hotspots for development and disease. *bioRxiv*. 2020:2020.03.19.998930.

- 472 30. Zeng Y, Amador C, Xia C, Marioni R, Sproul D, Walker RM, et al. Parent of origin genetic  
473 effects on methylation in humans are common and influence complex trait variation. *Nat*  
474 *Commun.* 2019;10(1):1383.
- 475 31. Sheffield NC, Bock C. LOLA: enrichment analysis for genomic region sets and regulatory  
476 elements in R and Bioconductor. *Bioinformatics.* 2016;32(4):587-9.
- 477 32. Consortium EP. An integrated encyclopedia of DNA elements in the human genome.  
478 *Nature.* 2012;489(7414):57-74.
- 479 33. Davis CA, Hitz BC, Sloan CA, Chan ET, Davidson JM, Gabdank I, et al. The Encyclopedia  
480 of DNA elements (ENCODE): data portal update. *Nucleic Acids Res.* 2018;46(D1):D794-D801.
- 481 34. Kent WJ, Sugnet CW, Furey TS, Roskin KM, Pringle TH, Zahler AM, et al. The human  
482 genome browser at UCSC. *Genome Res.* 2002;12(6):996-1006.
- 483 35. Joehanes R, Just AC, Marioni RE, Pilling LC, Reynolds LM, Mandaviya PR, et al.  
484 Epigenetic Signatures of Cigarette Smoking. *Circ Cardiovasc Genet.* 2016;9(5):436-47.
- 485 36. Battram T, Yousefi P, Crawford G, Prince C, Babei MS, Sharp G, et al. The EWAS  
486 Catalog: a database of epigenome-wide association studies. *OSF Preprints.* 2021.
- 487
